# Supplementary material for: Photo-response behavior of electrospun nanofibers based on spiropyran-cyclodextrin modified polymer
Source: Royal Society of Chemistry journal article supplement (doi:10.1039/c0jm01903h), 2010-01-01
Supplement: c0jm01903h.pdf [file c0jm01903h.pdf]

## Supporting Information

### Photo-response Behavior of Electrospun Nanofibers Based on Spiropyran- Cyclodextrin Modified Polymer.

*Frederico B. De Sousa<sup>a,b</sup>, João D. T. Guerreiro<sup>b,c</sup>, Minglin Ma<sup>d</sup>, Daniel G. Anderson<sup>b</sup>,  
Chester L. Drum<sup>b</sup>, Rubén D. Sinisterra<sup>a\*</sup> and Robert Langer<sup>b</sup>*

<sup>a</sup>Laboratório de Encapsulamento Molecular e Biomateriais (LEMB) – Departamento de Química, Instituto de Ciências Exatas, Universidade Federal de Minas Gerais (UFMG), Belo Horizonte, 31270-901, MG, Brazil.

<sup>b</sup>Department of Chemical Engineering, 77 Massachusetts Avenue, Massachusetts Institute of Technology, Cambridge, MA, 02139, USA.

<sup>c</sup>Institute for Biotechnology and Bioengineering, Center for Biological and Chemical Engineering, Instituto Superior Técnico, Lisboa, Portugal.

<sup>d</sup>David H. Koch Institute for Integrative Cancer Research, Massachusetts Institute of Technology, 77 Massachusetts Avenue, Cambridge, MA, 02139, USA. Department of Anesthesiology, Children Hospital Boston, 300 Longwood Avenue, Boston, MA, 02115, USA.

Corresponding author: Rubén Dario Sinisterra  
Departamento de Química, Instituto de Ciências Exatas,  
UFMG, Belo Horizonte, 31270-901 Brazil  
Phone: 55-31-3409-5778; fax: 55-31-3409-5700  
Email: [sinisterra@ufmg.br](mailto:sinisterra@ufmg.br)

SI 1 – Nuclear Magnetic Resonance

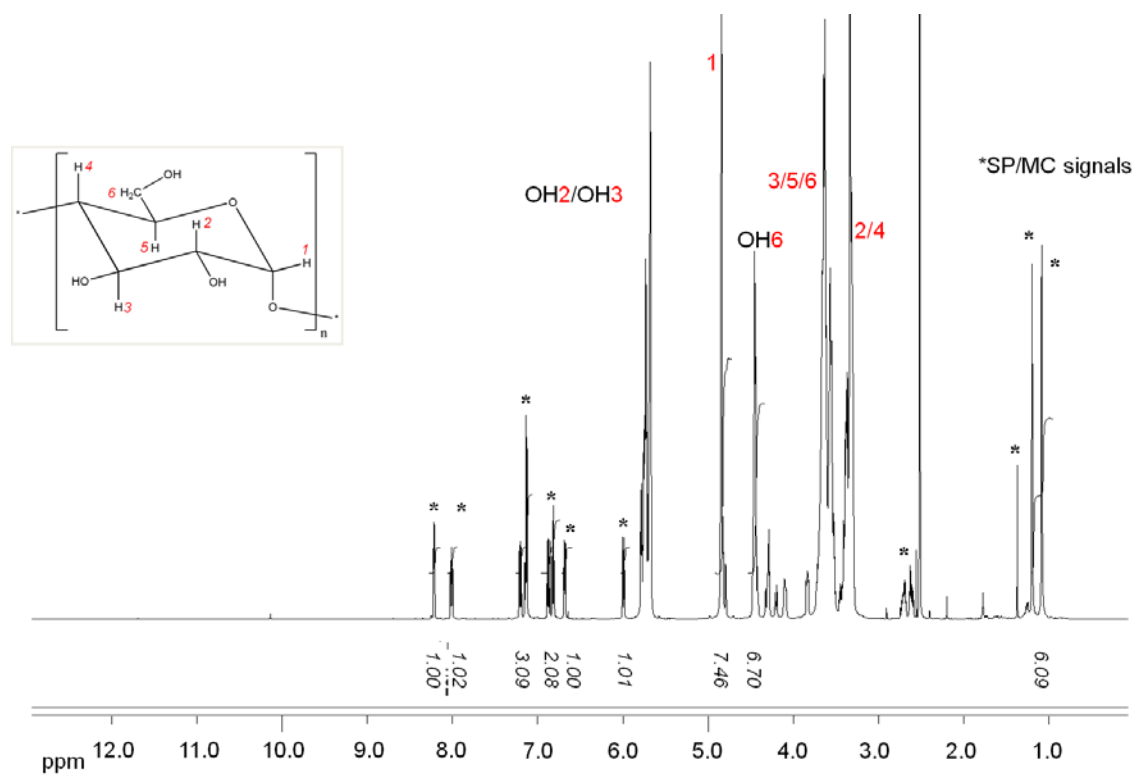

$^1\text{H}$  NMR spectrum of  $\beta\text{CD}_{\text{SP}}$  in  $\text{DMSO-}d_6$  at 600 MHz at 30 °C.

SI 2 – Nuclear Magnetic Resonance

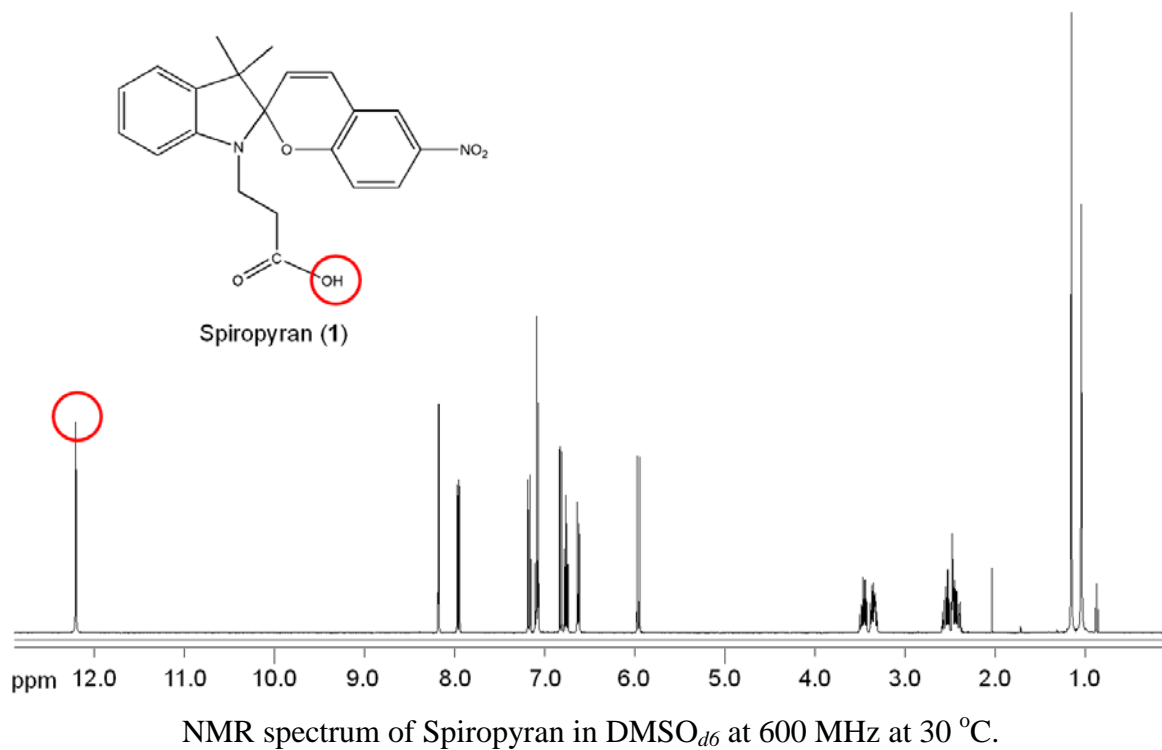

SI 3 – MALDI-TOF

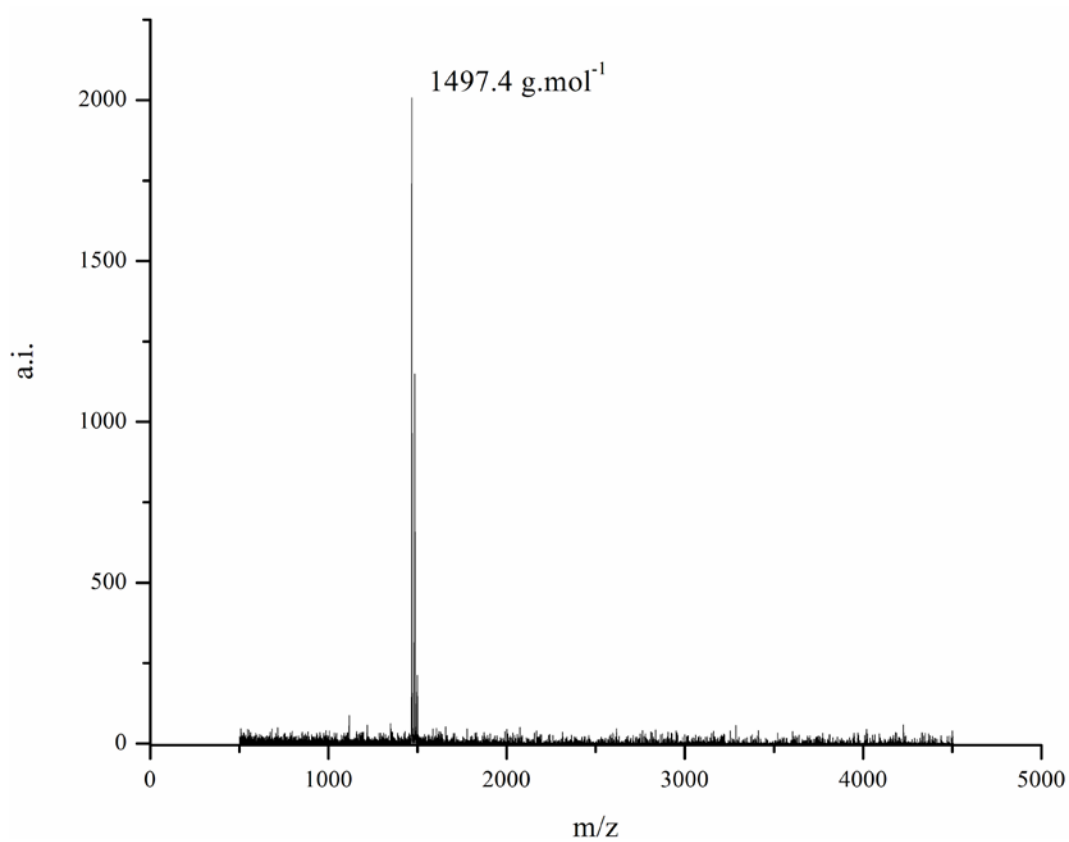

Mass spectrum for the mono- $\beta$ CD-spiropyran,  $m/z_{\text{calculated}}$  1496.5 and  $m/z_{\text{observed}}$  1497.4

SI 4 – Nuclear Magnetic Resonance

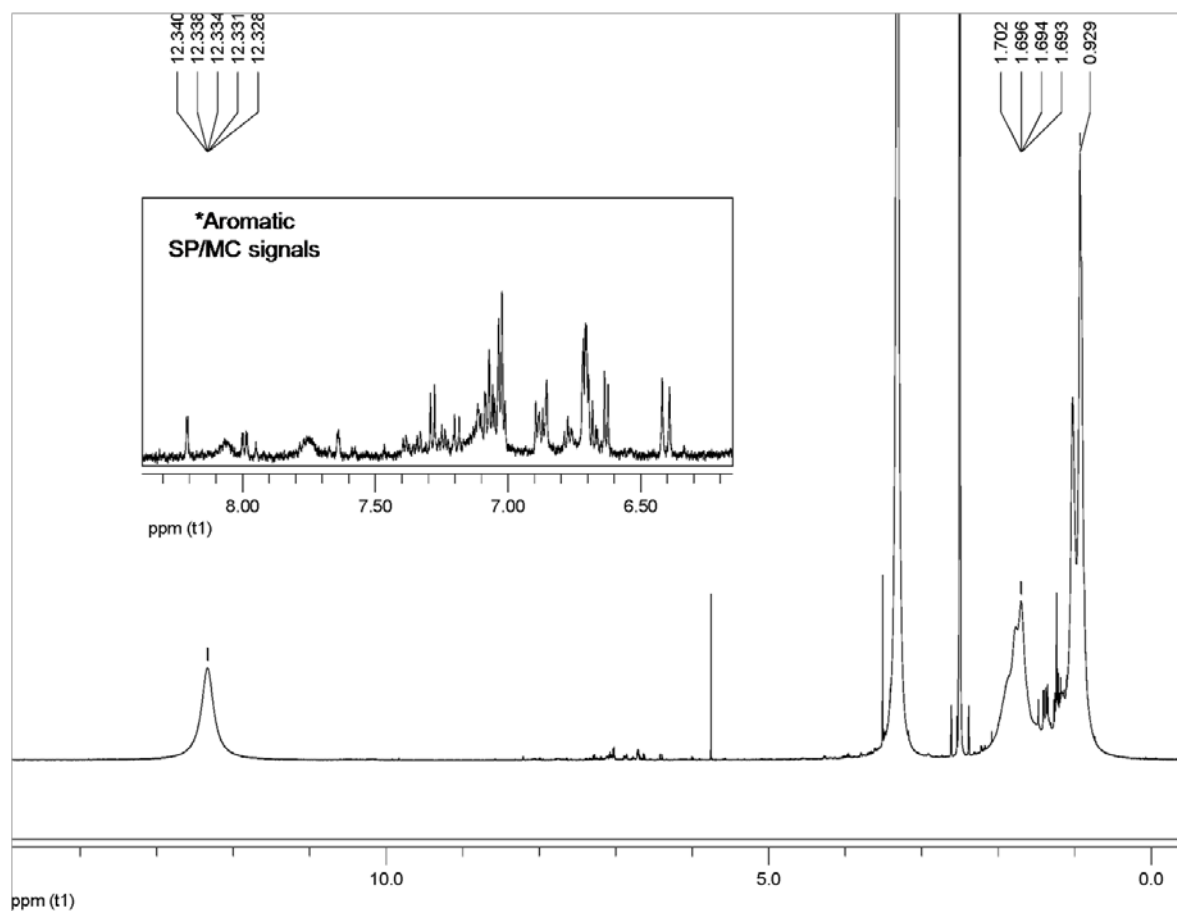

$^1\text{H}$  NMR spectrum of PMAA<sub>SP</sub> in DMSO<sub>*d*6</sub> at 600 MHz at 30 °C.

*SI 5 – Photochromic forms of  $\beta$ CD<sub>SP</sub>, PMAA- $\beta$ CD<sub>SP</sub> and PMAA<sub>SP</sub>*

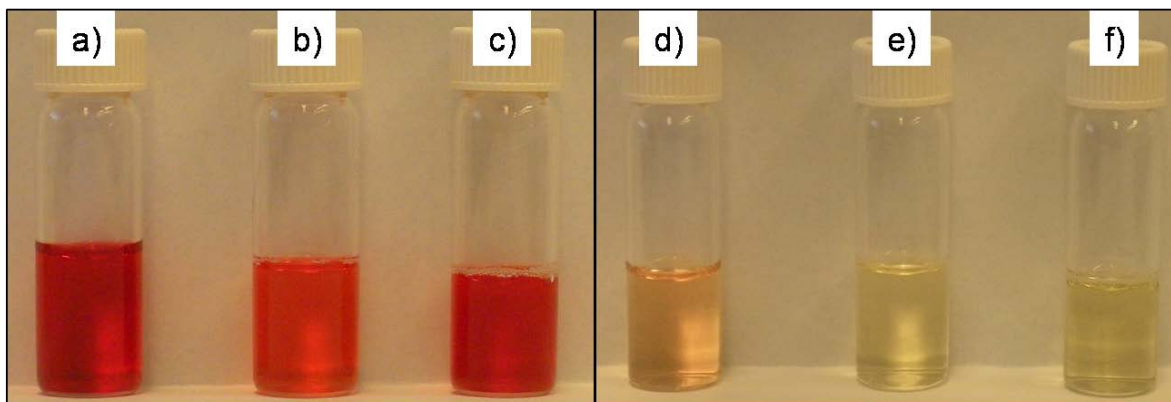

Merocyanine forms after UV irradiation of (a)  $\beta$ CD<sub>SP</sub>, (b) PMAA- $\beta$ CD<sub>SP</sub> and (c) PMAA<sub>SP</sub> and Spiro forms after visible light irradiation of (d)  $\beta$ CD<sub>SP</sub>, (e) PMAA- $\beta$ CD<sub>SP</sub> and (f) PMAA<sub>SP</sub>.

*SI 6 – Water Contact Angle Measurements*

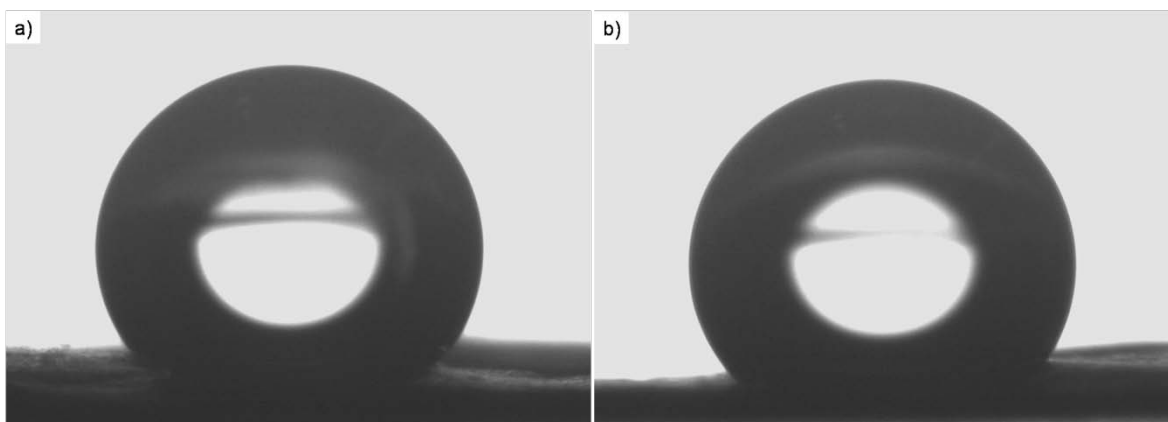

Water contact angles for a) PMAA-βCD<sub>SP</sub> after 24 hours visible light irradiation and b) PMAA-βCD<sub>MC</sub> after 24 hours UV light irradiation.

### SI 7 – Spin coating

Briefly, 0.3 mL of polymer solution was placed on a glass slide; a rotation velocity of 400 rpm for 5 seconds was used with a posterior rotation of 2300 rpm for 50 seconds. The glass slides were placed in oven at 170 °C for 12 hours to cross-link the polymer, after that, one was irradiated with UV while another one with visible light for 24 hours.

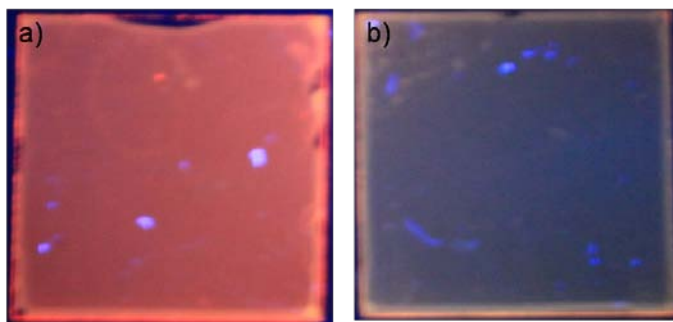

Spin coating films of PMAA- $\beta$ CD<sub>SP</sub> under UV light to demonstrate the fluorescence behavior of merocyanine incorporated in the polymer matrix with previous (a) UV light irradiation and (b) visible light irradiation.
